# Supplementary material
Source: PubMed Central journal article supplement (PMC5338659)
Supplement: supp_pp.17.00014_PP2016-01258D_Supplemental_Materialfigs.pdf [file supp_pp.17.00014_PP2016-01258D_Supplemental_Materialfigs.pdf]

## **A SUMO ligase AtMMS21 regulates the stability of the chromatin remodeler BRAHMA in root development**

Juanjuan Zhang,<sup>a,1</sup> Jianbin Lai,<sup>a,1</sup> Feige Wang,<sup>a,1</sup> Songguang Yang,<sup>b,1</sup> Zhipeng He,<sup>a</sup> Jieming Jiang,<sup>a</sup> Qingliang Li,<sup>c,d</sup> Qian Wu,<sup>a</sup> Yiyang Liu,<sup>a</sup> Mengyuan Yu,<sup>a</sup> Jinju Du,<sup>a</sup> Qi Xie,<sup>c,d</sup> Keqiang Wu,<sup>e</sup> Chengwei Yang,<sup>a,2</sup>

### **SUPPLEMENTAL FIGURES**

**Supplemental Figure 1.** Interaction assays between AtMMS21 (fused to BD) and the indicated chromatin remodeling and modification components (fused to AD) were performed in a yeast two-hybrid system. The results, including interaction (+) and no interaction (-), are shown in the table.

**Supplemental Figure 2.** The treatment of MG132 increases the protein level of BRM-GFP. The 5-day-old seedlings were treated by 50  $\mu$ M MG132 (the stock is prepared in DMSO), the seedlings in the medium containing DMSO was used as a control. The images for BRM-GFP (in green) were taken after 6 hours. The PI staining is shown in red. Bar=100  $\mu$ m. The data are a representative from at least three independent experiments. The quantification of GFP signals at the bottom panel is from 100 nuclei in three independent experiments. \*\*\*  $p < 0.001$ , Student's t test.

**Supplemental Figure 3.** The expression levels of *AtMMS21* in the complementary lines for *BRM-GFP/mms21-1*. The RNA extracted from 5-day-old seedlings was used for RT-PCR, *ACTIN2* was used as a reference gene.

**Supplemental Figure 4.** The expression levels of *BRM* in the *BRM* overexpression lines. The RNA extracted from 5-day-old seedlings was used for RT-PCR, *ACTIN2* was used as a reference gene.

**Supplemental Figure 5.** The effect of *BRM* deletion in the *mms21-1* background. The photo was taken 5 days after germination. Bar=1cm. The measurement of root length of 5-day-old wild type, *mms21-1* and *mms21-1 brm-3* are shown in the right panel. The data are means  $\pm$  SD from three biological independent experiments (n=20). \*\*\*  $p < 0.001$ , Student's t test.

| AD    | BD-AtMMS21 |
|-------|------------|
| JMJ15 | -          |
| HDA6  | -          |
| HDA19 | -          |
| GCN5  | -          |
| ADA2B | -          |
| BRM   | +          |
| SWI3B | -          |
| SWI3C | -          |

**Supplemental Figure 1**

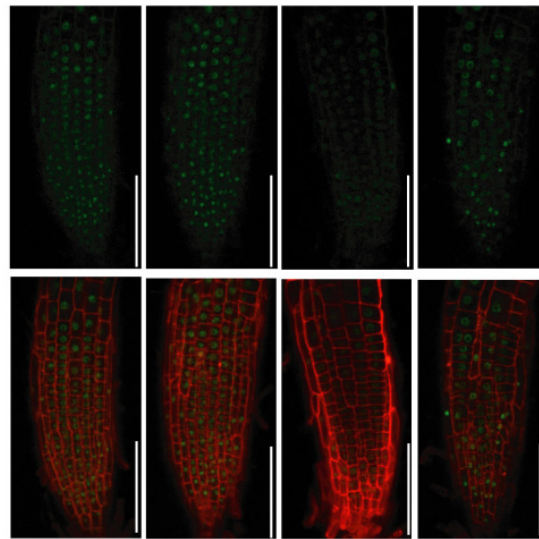

WT + DMSO      WT + MG132      *mms21-1* + DMSO      *mms21-1* + MG132

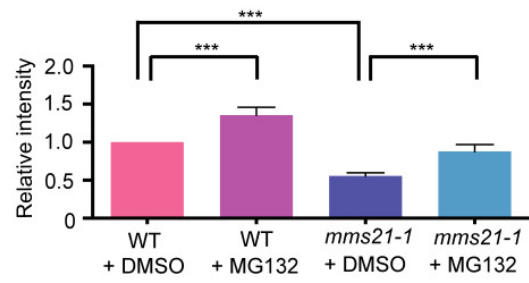

Supplemental Figure 2

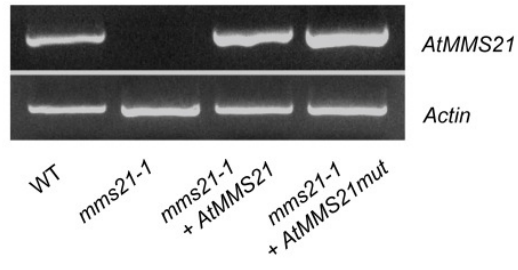

**Supplemental Figure 3**

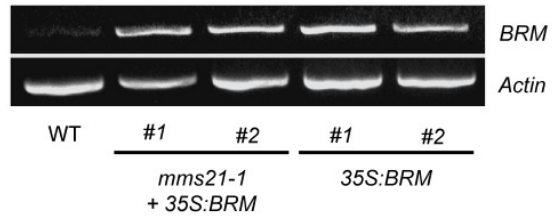

**Supplemental Figure 4**

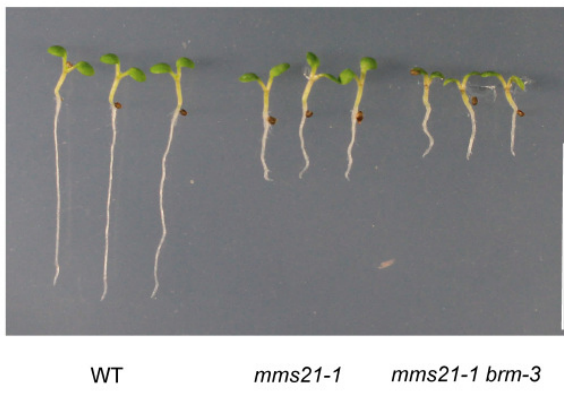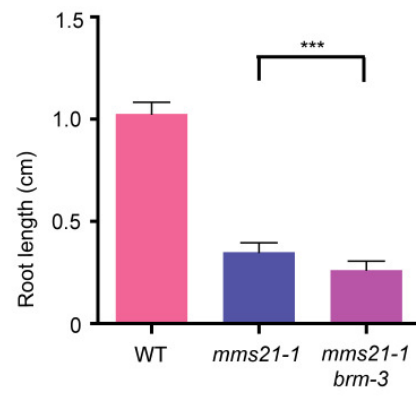

Supplemental Figure 5
