# Supplementary material
Source: PubMed Central journal article supplement (PMC5338659)
Supplement: supp_pp.17.00014_PP2016-01258D_Supplemental_Materialtbl.pdf [file supp_pp.17.00014_PP2016-01258D_Supplemental_Materialtbl.pdf]

**A SUMO ligase AtMMS21 regulates the stability of the chromatin remodeler  
BRAHMA in root development**

Juanjuan Zhang,<sup>a,1</sup> Jianbin Lai,<sup>a,1</sup> Feige Wang,<sup>a,1</sup> Songguang Yang,<sup>b,1</sup> Zhipeng He,<sup>a</sup>  
Jieming Jiang,<sup>a</sup> Qingliang Li,<sup>c,d</sup> Qian Wu,<sup>a</sup> Yiyang Liu,<sup>a</sup> Mengyuan Yu,<sup>a</sup> Jinju Du,<sup>a</sup> Qi  
Xie,<sup>c,d</sup> Keqiang Wu,<sup>e</sup> Chengwei Yang,<sup>a,2</sup>

**Supplemental Table 1. Primers used in this study.**

| Name           | Sequence (5'-3')                         | Use                                                 |
|----------------|------------------------------------------|-----------------------------------------------------|
| AtMMS21-N-BD-F | CCATGGAGATGGCGTCGGCGTCCTCG               | Yeast two hybrid<br>( <i>pGBKT7</i> )               |
| AtMMS21-N-BD-R | GGATCCCTAACCAGGCATTGGTTACCTGC            | Yeast two hybrid<br>( <i>pGBKT7</i> )               |
| AtMMS21-C-BD-F | CCGGAATTCGACATTGTTATGACCAGTACTCAG        | Yeast two hybrid<br>( <i>pGBKT7</i> )               |
| AtMMS21-C-BD-R | CCGCTCGAGCTAATCTTCATCCACATCTTCTG         | Yeast two hybrid<br>( <i>pGBKT7</i> )               |
| BRM-N-AD-F     | ATAGGATCCAAATGCAATCTGGAGGCAGTGGCG        | Yeast two hybrid<br>( <i>pGADT7</i> )               |
| BRM-N-AD-R     | ATAGAGCTCGATTTTCTTTTGGCGCATTCAAT         | Yeast two hybrid<br>( <i>pGADT7</i> )               |
| BRM-M-AD-F     | ATAGAATTCATGTCATCTGTCAACAAGTACTATACTCTGG | Yeast two hybrid<br>( <i>pGADT7</i> )               |
| BRM-M-AD-R     | ATAGAGCTCGAGTTGTCCTTTGGTCAAAACGACC       | Yeast two hybrid<br>( <i>pGADT7</i> )               |
| BRM-C-AD-F     | ATAGGATCCAAATGCATGAAGAGCGACGAATGAC       | Yeast two hybrid<br>( <i>pGADT7</i> )               |
| BRM-C-AD-R     | ATAGAGCTCGCTATAAATGGCTAGGCCGTC           | Yeast two hybrid<br>( <i>pGADT7</i> )               |
| SUMO1-BD-F     | ATAGGATCCGTATGTCTGCAAACCAGGAGGAAG        | Yeast two hybrid<br>( <i>pGBKT7</i> )               |
| SUMO1-BD-R     | ATACTGCAGCGCCACCAGTCTGATGGAG             | Yeast two hybrid<br>( <i>pGBKT7</i> )               |
| SUMO3-BD-F     | ATAGGATCCGTATGTCTAACCCTCAAGATGACAAGC     | Yeast two hybrid<br>( <i>pGBKT7</i> )               |
| SUMO3-BD-R     | ATACTGCAGCGTCAACCACCACTCATCGCC           | Yeast two hybrid<br>( <i>pGBKT7</i> )               |
| GST-AtMMS21-F  | ATAGGATCCATGGCGTCGGCGTCCTCG              | Expression in <i>E. Coli</i><br>( <i>pGEX4T-1</i> ) |
| GST-AtMMS21-R  | ATACTCGAGCTAATCTTCATCCACATCTTCT          | Expression in <i>E. Coli</i>                        |

|                |                                                                                 |                                                       |
|----------------|---------------------------------------------------------------------------------|-------------------------------------------------------|
|                |                                                                                 | ( <i>pGEX4T-1</i> )                                   |
| FLAG-BRM-N-F   | AGTCCATGGGCCATCACCATCATCACCACGATTACAAGGA<br>TGACGACGATAAG                       | Expression in <i>E. Coli</i><br>( <i>pCDFDuet-1</i> ) |
| FLAG-BRM-N-R   | GGACCCATGGCCGGATTCCGAG                                                          | Expression in <i>E. Coli</i><br>( <i>pCDFDuet-1</i> ) |
| YFP-BRM-N-F    | ATACCCGGGATGCAATCTGGAGGCAGTGGC                                                  | Transient expression<br>(35S: <i>YFP</i> vector)      |
| YFP-BRM-N-R    | ATAACTAGTTCAATTTCTTTTGGCGCATTCAATTCC                                            | Transient expression<br>(35S: <i>YFP</i> vector)      |
| MYC-AtMMS21-F  | GGATCCATATGGCGTCGGCGTCCTCG                                                      | Transgenic plants<br>( <i>pBA002-MYC</i> )            |
| MYC-AtMMS21-R  | ACTAGTCTAATCTTCATCCACATCTTCT                                                    | Transgenic plants<br>( <i>pBA002-MYC</i> )            |
| NLUC-BRM-N-F   | ATAGGATCCAATGCAATCTGGAGGCAGTGGCG                                                | LCI assay<br>( <i>pCAMBIA-NLuc</i> )                  |
| NLUC-BRM-N-R   | ATAGTCGACATTTCTTTTGGCGCATTCAATTCC                                               | LCI assay<br>( <i>pCAMBIA-NLuc</i> )                  |
| CLUC-AtMMS21-F | ATAGGATCCAATGGCGTCGGCGTCCTCGTCTGA                                               | LCI assay<br>( <i>pCAMBIA-CLuc</i> )                  |
| CLUC-AtMMS21-R | ATAGTCGACCTAATCTTCATCCACATCTTCTGT                                               | LCI assay<br>( <i>pCAMBIA-CLuc</i> )                  |
| SCE1-ACYC-F    | AGTGAATTCGATGGCTAGTGGAAATCGCTCGTG                                               | SUMOylation<br>( <i>pACYCDuet-1</i> )                 |
| SCE1-ACYC-R    | AGTGTCGACTTAGACAAGAGCAGGATACTGCTTG                                              | SUMOylation<br>( <i>pACYCDuet-1</i> )                 |
| SUMO1GG-ACYC-F | AGATCTCGAGCAAAAGCTCATTTCTGAAGAGGACTTGAT<br>GTCTGCAAACCAGGAGGAAG                 | SUMOylation<br>( <i>pACYCDuet-1</i> )                 |
| SUMO1GG-ACYC-R | AGTACTAGTCTCGAGTCAGCCACCAGTCTGATGGAGCAT<br>C                                    | SUMOylation<br>( <i>pACYCDuet-1</i> )                 |
| SUMO3GG-ACYC-F | AGATCTCGAGCAAAAGCTCATTTCTGAAGAGGACTTGAT<br>GTCTAACCCTCAAGATGACAAG               | SUMOylation<br>( <i>pACYCDuet-1</i> )                 |
| SUMO3GG-ACYC-R | CTCGAGTCAACCACCACTCATCGCCCGGCAC                                                 | SUMOylation<br>( <i>pACYCDuet-1</i> )                 |
| OE-AtMMS21-F   | ATAGGATCCTAATGGCGTCGGCGTCCTCGTCTG                                               | Transgenic plants<br>( <i>pCanGmyc</i> )              |
| OE-AtMMS21-R   | ATAGAGCTCTATCTTCATCCACATCTTCTGTG                                                | Transgenic plants<br>( <i>pCanGmyc</i> )              |
| OE-BRM-F       | AGTGGCGCGCCGTTTAACTTATGGATTACAAGGATGAC<br>GACGATAAGCCCGGATGCAATCTGGAGGCAGTGGCGG | Transgenic plants<br>( <i>pCanGmyc</i> )              |
| OE-BRM-R       | AGTGAGCTCCTATAAATGGCTAGGCCGTCTTTTAC                                             | Transgenic plants<br>( <i>pCanGmyc</i> )              |
| AtMMS21-mut-F  | GTTCGCAGTATGGATTCCAGGGCCGTCTATGAAAATCTG                                         | Mutagenesis                                           |

|               |                                   |                 |
|---------------|-----------------------------------|-----------------|
| AtMMS21-mut-R | TGGATCTGCTAATTCAGTGACAGGC         | Mutagenesis     |
| QRT-BRM-F     | TGGCACACATCCTTCAGGCA              | Realtime RT-PCR |
| QRT-BRM-R     | GGCCTTCGCTGATCCTGACT              | Realtime RT-PCR |
| QRT-GFP-F     | AGGAGGACGGCAACATCCTG              | Realtime RT-PCR |
| QRT-GFP-R     | GATGGGGGTGTTCTGCTGGT              | Realtime RT-PCR |
| RT-BRM-F      | ATAGGATCCAAATGCAATCTGGAGGCAGTGGCG | RT PCR          |
| RT-BRM-R      | TAGTTGTCCGGTACCCACCTGCTG          | RT-PCR          |
| RT-GFP-F      | ATGGTGAGCAAGGGCGAGGA              | RT PCR          |
| RT-GFP-R      | TTACTTGTACAGCTCGTCCATGCCG         | RT-PCR          |
